# Supplementary material for: Integrating Genomic and Chromosomal Data: A Cytogenetic Study of Transancistrus santarosensis (Loricariidae: Hypostominae) with Characterization of a ZZ/ZW Sex Chromosome System
Source: MDPI journal article supplement (doi:10.3390/genes14091662), 2023-08-22
Supplement: s1 [file s1]

Table S2. GenBank Accession Number and sampling area of COI sequences used in phylogenetic analyses

| Species                        | A.N.     | Sampling area                            |
|--------------------------------|----------|------------------------------------------|
| <i>Chaetostoma sp1_</i>        | EU359409 | Unknown                                  |
| <i>Chaetostoma sp2_</i>        | EU359410 | Unknown                                  |
| <i>Chaetostoma fischeri</i>    | MG936828 | Panama: Rio Chagres                      |
| <i>Chaetostoma fischeri</i>    | MG936829 | Panama: Rio Acla                         |
| <i>Chaetostoma fischeri</i>    | MG936830 | Panama: Rio Tuira, Rio Yape              |
| <i>Chaetostoma fischeri</i>    | MG936831 | Panama: Rio Tuira, Rio Membrillo         |
| <i>Chaetostoma fischeri</i>    | MG936832 | Panama: Rio Bayano, Rio Aguas Claras     |
| <i>Chaetostoma fischeri</i>    | MG936833 | Panama: Rio Bayano, Rio Ipeti            |
| <i>Leptoancistrus canensis</i> | MG937046 | Panama: Rio Chagres                      |
| <i>Leptoancistrus canensis</i> | MG937047 | Panama: Rio Indio                        |
| <i>Leptoancistrus canensis</i> | MG937048 | Panama: Rio Cocle del Sur                |
| <i>Leptoancistrus canensis</i> | MG937049 | Panama: Rio Bayano, Rio Aguas Claras     |
| <i>Ancistrus clementinae</i>   | OQ132522 | Ecuador: Rio Palenque, Rio La Moquillada |
| <i>Ancistrus clementinae</i>   | OQ132523 | Ecuador: Rio Palenque                    |
