# Supplementary material for: Integrating Genomic and Chromosomal Data: A Cytogenetic Study of Transancistrus santarosensis (Loricariidae: Hypostominae) with Characterization of a ZZ/ZW Sex Chromosome System
Source: MDPI journal article supplement (doi:10.3390/genes14091662), 2023-08-22
Supplement: s1 [file s1]

**Table S1.** *Transancistrus santarosensis*. Summary of the information on collection date and site, sex (M = male, F = Female, I = Indeterminate) and analysis of the specimens. *Chaetostoma bifurcum* individuals used in molecular analysis are also included. COI haplotype is indicated. Voucher numbers refer according to the Universidad Technica de Machala catalogue (UTMACH) or the Instituto Nacional de Biodiversidad collection (MECN-DP)

| Individual                   | Genus/species           | Collection site    | Date of collection | Sex | Cytogenet | COI Hp | Voucher n.   |
|------------------------------|-------------------------|--------------------|--------------------|-----|-----------|--------|--------------|
| <b><i>Transancistrus</i></b> |                         |                    |                    |     |           |        |              |
| 155                          | <i>T. santarosensis</i> | Palenque           | 24/02/2016         | M   | X         | Ts1    | UTMACH-155   |
| 156                          | <i>T. santarosensis</i> | Palenque           | 24/02/2016         | I   | X         | Ts1    | UTMACH-156   |
| 157                          | <i>T. santarosensis</i> | Palenque           | 24/02/2016         | M   | X         | Ts1    | UTMACH-157   |
| 158                          | <i>T. santarosensis</i> | Río Dos Bocas      | 24/02/2016         | M   | -         | Ts2    | UTMACH-158   |
| 443                          | <i>T. santarosensis</i> | Río Dos Bocas      | 1/07/2022          | I   | X         | -      | UTMACH-443   |
| 444                          | <i>T. santarosensis</i> | Río Dos Bocas      | 1/07/2022          | I   | X         | -      | MECN-DP 4960 |
| 445                          | <i>T. santarosensis</i> | Río Dos Bocas      | 1/07/2022          | I   | X         | -      | MECN-DP 4960 |
| 446                          | <i>T. santarosensis</i> | Río Dos Bocas      | 1/07/2022          | I   | X         | -      | MECN-DP 4960 |
| 447                          | <i>T. santarosensis</i> | Río Dos Bocas      | 1/07/2022          | M   | X         | -      | MECN-DP 4960 |
| 448                          | <i>T. santarosensis</i> | Río Dos Bocas      | 1/07/2022          | F   | X         | -      | MECN-DP 4960 |
| 452                          | <i>T. santarosensis</i> | Río Dos Bocas      | 2/09/2022          | I   | X         | Ts2    | UTMACH-452   |
| 453                          | <i>T. santarosensis</i> | Río Dos Bocas      | 2/09/2022          | I   | X         | -      | UTMACH-453   |
| 457                          | <i>T. santarosensis</i> | Río Dos Bocas      | 5/09/2022          | F   | X         | Ts2    | UTMACH-457   |
| 458                          | <i>T. santarosensis</i> | Río Dos Bocas      | 7/09/2022          | F   | X         | Ts2    | UTMACH-458   |
| 460                          | <i>T. santarosensis</i> | Palenque           | 11/09/2022         | F   | X         | -      | UTMACH-460   |
| 464                          | <i>T. santarosensis</i> | Palenque           | 11/09/2022         | F   | X         | -      | UTMACH-464   |
| 465                          | <i>T. santarosensis</i> | Palenque           | 11/09/2022         | F   | X         | Ts1    | UTMACH-465   |
| 466                          | <i>T. santarosensis</i> | Palenque           | 11/09/2022         | F   | X         | Ts1    | UTMACH-466   |
| 467                          | <i>T. santarosensis</i> | Palenque           | 11/09/2022         | I   | X         | Ts1    | UTMACH-467   |
| 468                          | <i>T. santarosensis</i> | Río Dos Bocas      | 11/09/2022         | I   | X         | -      | UTMACH-468   |
| 469                          | <i>T. santarosensis</i> | Río Dos Bocas      | 11/09/2022         | F   | X         | -      | UTMACH-469   |
| 470                          | <i>T. santarosensis</i> | Río Dos Bocas      | 06/01/2023         | I   | X         | -      | UTMACH-470   |
| 471                          | <i>T. santarosensis</i> | Río Dos Bocas      | 06/01/2023         | F   | X         | -      | UTMACH-471   |
| 472                          | <i>T. santarosensis</i> | Río Dos Bocas      | 09/01/2023         | I   | X         | -      | UTMACH-472   |
| 474                          | <i>T. santarosensis</i> | Río Dos Bocas      | 12/01/2023         | I   | X         | -      | UTMACH-474   |
| <b><i>Chaetostoma</i></b>    |                         |                    |                    |     |           |        |              |
| 437                          | <i>C. bifurcum</i>      | Río Dos Bocas      | 30/06/2022         | I   | -         | Cb1    | UTMACH-437   |
| 439                          | <i>C. bifurcum</i>      | Río Dos Bocas      | 30/06/2022         | F   | -         | Cb1    | UTMACH-439   |
| 461                          | <i>C. bifurcum</i>      | Cascada Río Blanco | 20/12/2022         | M   | -         | Cb1    | UTMACH-461   |
| 462                          | <i>C. bifurcum</i>      | Cascada Río Blanco | 20/12/2022         | I   | -         | Cb1    | UTMACH-462   |
