# Supplementary figures and images for: Integrating Genomic and Chromosomal Data: A Cytogenetic Study of Transancistrus santarosensis (Loricariidae: Hypostominae) with Characterization of a ZZ/ZW Sex Chromosome System
Source: MDPI journal article supplement (doi:10.3390/genes14091662), 2023-08-22

**Figure S1.** NJ (a) and ML (b) phylogenetic trees. Node support values higher than 75% are shown

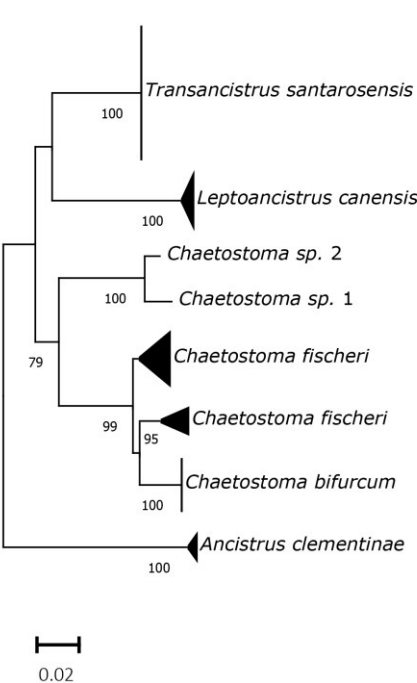

a)

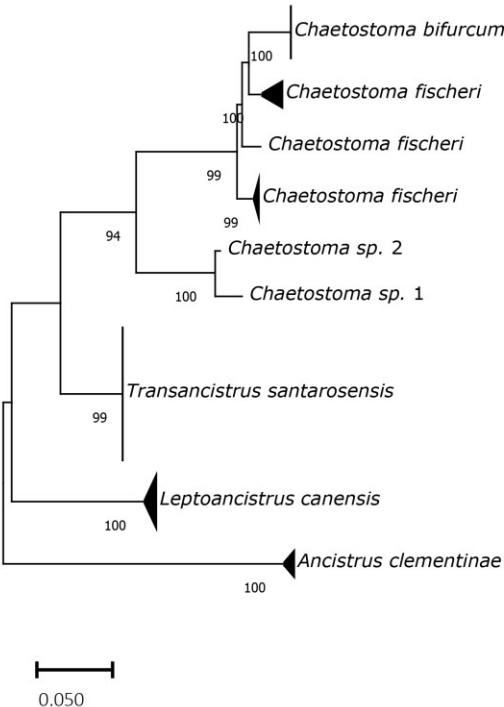

b)

Supplement: s1 [file s1]
